# Supplementary material for: Luteolin Attenuates Hypertension via Inhibiting NF-κB-Mediated Inflammation and PI3K/Akt Signaling Pathway in the Hypothalamic Paraventricular Nucleus
Source: MDPI journal article supplement (doi:10.3390/nu15030502), 2023-01-18
Supplement: s1 [file s1]

Western blotting Gels:  
Figure S1

Total PI3K  
85KDa

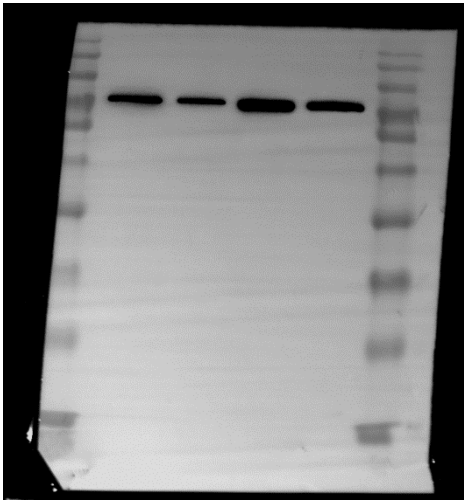

|          | WKY | WKY | SHR | SHR |
|----------|-----|-----|-----|-----|
| Vehicle  | +   | -   | +   | -   |
| Luteolin | -   | +   | -   | +   |

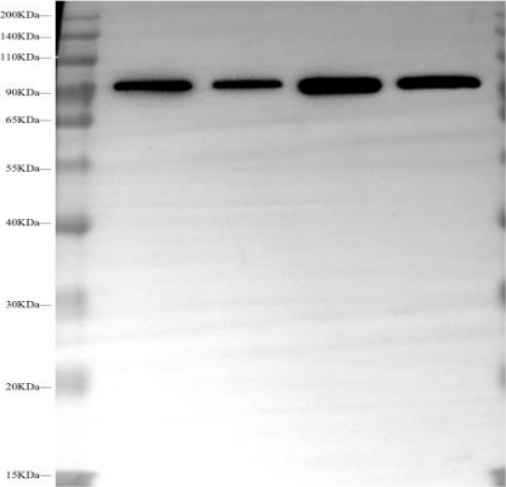

Total PI3K  
85KDa

p- PI3K  
85KDa

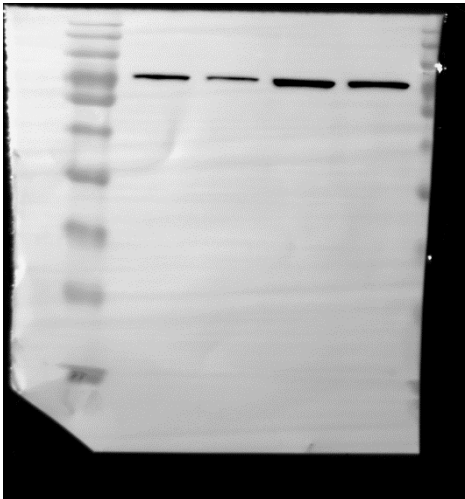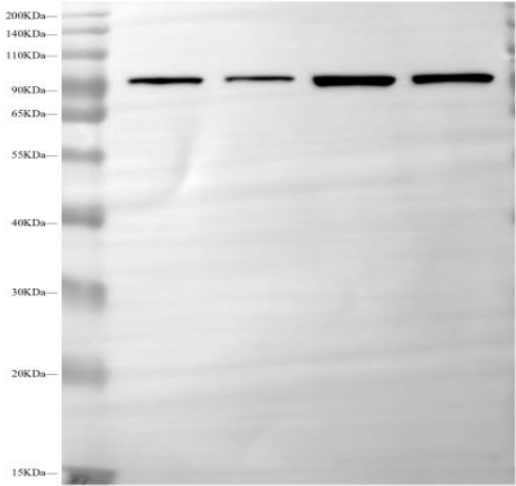

p- PI3K  
85KDa

Figure S1: luteolin decreased the protein expressions of p-PI3K in the PVN of SHRs.

Western blotting Gels:  
Figure S2

Total AKt  
60KDa

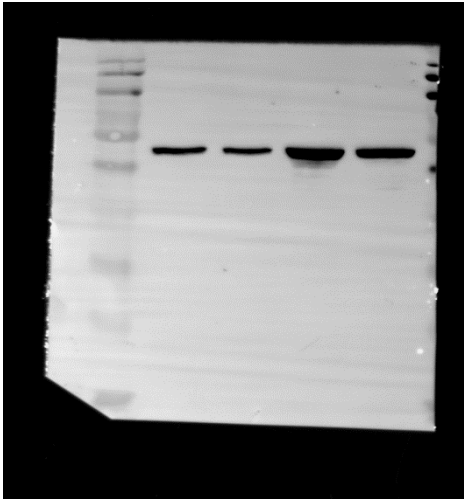

|          | WKY | WKY | SHR | SHR |
|----------|-----|-----|-----|-----|
| Vehicle  | +   | -   | +   | -   |
| Luteolin | -   | +   | -   | +   |

Total AKt  
60KDa

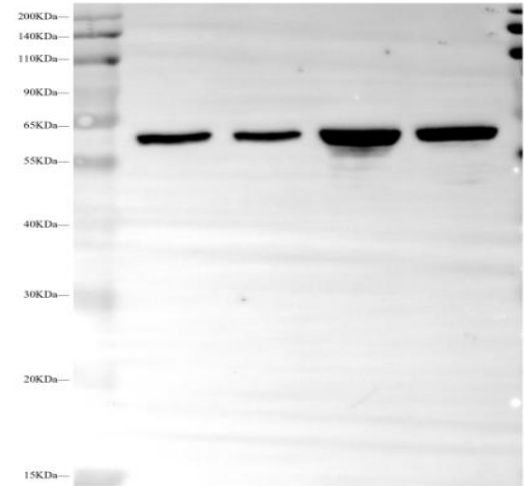

p- AKt  
60KDa

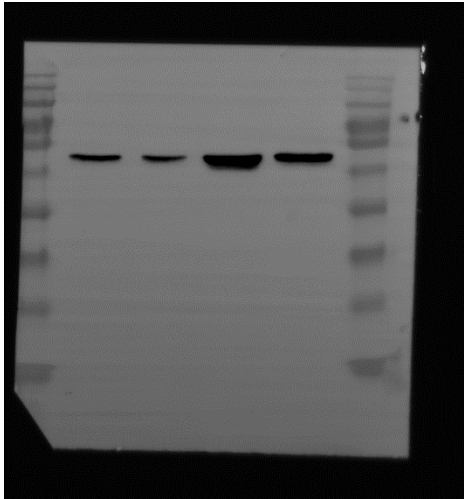

p- AKt  
60KDa

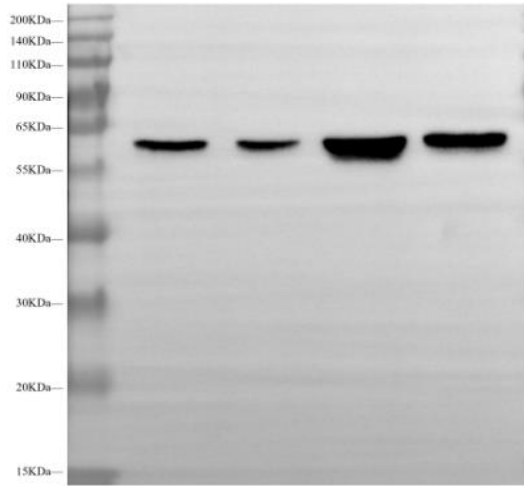

Figure S2: luteolin decreased the protein expressions of p-Akt in the PVN of SHRs.

Western blotting Gels:  
Figure S3

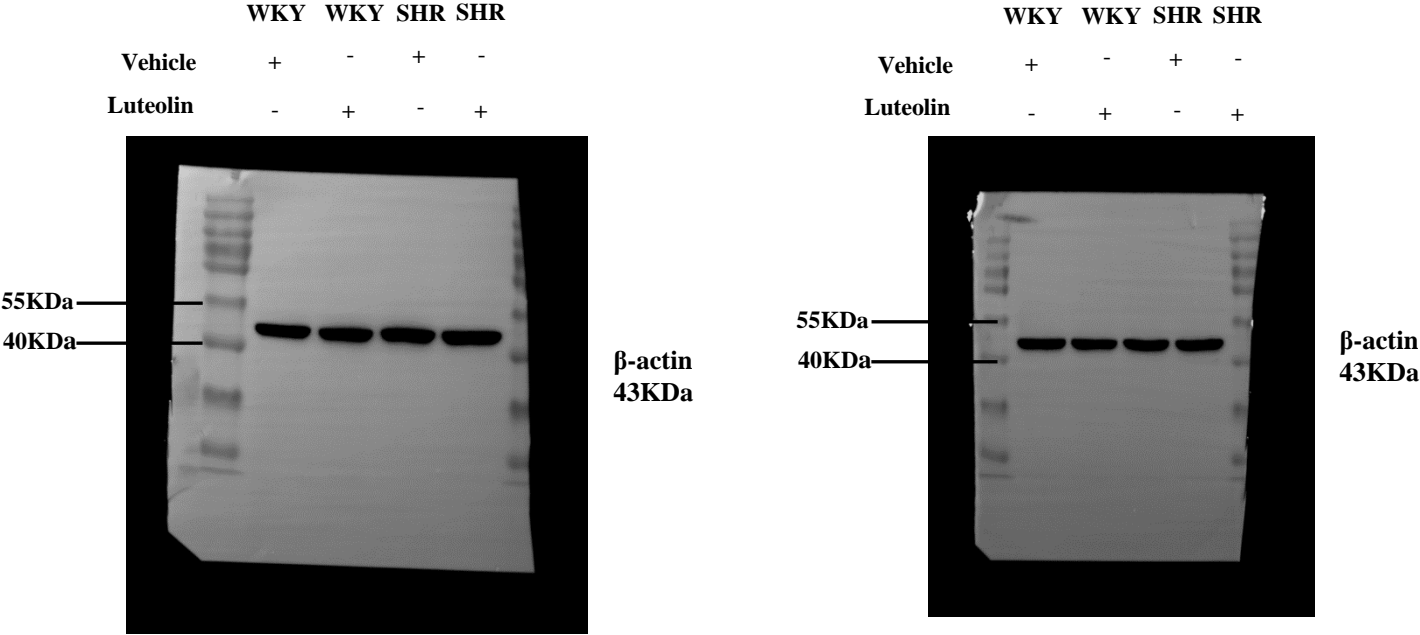

Figure S3: Internal reference of each group of proteins
